# Supplementary material for: A MAT1–2 wild-type strain from Penicillium chrysogenum: functional mating-type locus characterization, genome sequencing and mating with an industrial penicillin-producing strain
Source: PubMed Central journal article supplement — Mol Microbiol. 2015 Jan 30;95(5):859–74. doi: 10.1111/mmi.12909 (PMC4357460; doi:10.1111/mmi.12909), 2015-01-30
Supplement: mmi0095-0859-sd1.pdf [file mmi0095-0859-sd1.pdf]

## 1 **Supporting information**

2

## 3 **Supplementary methods**

4

## 5 **File S1**

### 6 **I. Calculation of SNPs and construction of consensus sequence**

#### 7 **a) Quality control and trimming of Illumina raw data**

8 Correction and trimming of the raw Illumina HiSeq reads with a size of 100 nt obtained from the ~300  
9 bp PE library sequencing of Pc3 were performed with Trimmomatic v0.30 (Bolger *et al.*, 2014) using  
10 the following parameters.

```
11 java -jar trimmomatic-0.30.jar PE -phred33  
12 NG-6796_Pc3_lib26819_1663_8_1.fastq NG-6796_Pc3_lib26819_1663_8_2.fastq  
13 NG-6796_Pc3_lib26819_1663_8_1_trimmed_paired.fastq  
14 NG-6796_Pc3_lib26819_1663_8_1_trimmed_unpaired.fastq  
15 NG-6796_Pc3_lib26819_1663_8_2_trimmed_paired.fastq  
16 NG-6796_Pc3_lib26819_1663_8_2_trimmed_unpaired.fastq  
17 ILLUMINACLIP:Illumina-PE-gDNA.fa:2:30:10  
18 LEADING:10 TRAILING:10 SLIDINGWINDOW:4:18 MINLEN:50
```

19 The file Illumina-PE\_gDNA.fa contains all used Illumina adapters and primers (PCR- and seq-  
20 Primer). The quality of the processed reads was checked with FastQC.

```
21 ./fastqc ./input/NG-6796_Pc3_lib26819_1663_8_1.fastq
```

22 For the correction and trimming of the raw Illumina HiSeq reads with a size of 50 nt obtained from  
23 single-end library sequencing of ascospore isolates AS25 and AS25-3 the parameters were adapted to  
24 library type and read length. An example is given for the reads obtained from AS25-3.

```
25 java -jar trimmomatic-0.30.jar SE -phred33 ./input/NG-  
26 6879_P2_x_25_AS_3_lib28637_1722_7_1.fastq NG-6879_P2_x_25_AS_3_trimmed.fastq  
27 ILLUMINACLIP:TruSeq-DNA-SE.fa:2:30:10 LEADING:10 TRAILING:10 SLIDINGWINDOW:4:18  
28 MINLEN:20
```

#### 29 **b) Mapping of reads on a reference genome sequence**

30 The processed reads obtained from the next-generation sequencing of Pc3, AS25, and AS25-3 were  
31 mapped to the P2niaD18 genome sequence (Chaudhuri *et al.*, 2011). Furthermore, processed reads of  
32 ascospore isolate AS25 were mapped on the *de novo* assembled contigs of Pc3 (see section II for  
33 assembly details) and reads obtained from ascospore isolate AS25-3 were mapped to an afore  
34 predicted consensus sequence of AS25. Mapping of the 100 nt long reads obtained from Pc3 genome  
35 sequencing was performed with bowtie2 v2.1.0 (Langmead & Salzberg, 2012) with the following  
36 parameters. Sorted bam files and index files were created with samtools (Li *et al.*, 2009). The sorted  
37 bam file was used for SNP calling (see section I d)).

38

```
39 bowtie2-build ./input/P2_niaD18.fa P2_niaD18.build
```

40

```
41 bowtie2 -q -p 4 --phred33 -l 50 -X 1000 --fr P2_niaD18.build -1 ./input/NG-  
42 6796_Pc3_lib26819_1663_8_1_trimmed_paired.fastq -2 ./input/NG-  
43 6796_Pc3_lib26819_1663_8_2_trimmed_paired.fastq -S Pc3_500PE_vs_P2_niaD18.sam
```

```

44 samtools view -bS Pc3_500PE_vs_P2_niaD18.sam > Pc3_500PE_vs_P2_niaD18.bam
45
46 samtools sort Pc3_500PE_vs_P2_niaD18.bam Pc3_500PE_vs_P2_niaD18_sorted
47
48 samtools index Pc3_500PE_vs_P2_niaD18_sorted.bam
49

```

50 For the mapping of the 50 nt long reads obtained from the single-end libraries of AS25 and AS25-3  
51 were mapped with parameters adapted on single-end libraries. An example is given below. The sam  
52 file was sorted and indexed with samtools like mentioned before.

```

53 bowtie-build2 ./input/P2_niaD18.fa P2_niaD18.build
54
55 bowtie2 -q -p 4 --phred33 P2_niaD18.build ./input/ NG-6879_P2_x_25_AS_3_trimmed.fastq -S
56 AS3_vs_P2_niaD18.sam
57

```

#### 56 **d) SNP-calling**

57 SNP calling was performed with mpileup, which is a part of samtools, for all combinations listed in  
58 Table 1. The resulting vcf files were used as input for custom-made perl scripts. The varFilter option  
59 was used to filter ambiguous loci and low coverage regions. The value for varFilter was set twice as  
60 high as the average coverage, calculated from the mapping. On overview of the settings of varFilter  
61 used for the different analyses is given in the table below.

```

62 samtools mpileup -uD -f P2_niaD18.fa Pc3_500PE_vs_P2_niaD18_sorted.bam | bcftools view -bvgc -
63 > Pc3_500PE_vs_P2_niaD18_samtools.raw.bcf
64
65 bcftools view Pc3_500PE_vs_P2_niaD18_samtools.raw.bcf | vcftutils.pl varFilter -D70 >
66 Pc3_500PE_vs_P2_niaD18_samtools.vcf
67

```

| reads of      | mapped on      | coverage | varFilter | total SNPs |
|---------------|----------------|----------|-----------|------------|
| <b>Pc3</b>    | P2niaD18       | 31.4     | -D70      | 33,956     |
| <b>AS25</b>   | P2niaD18       | 22.2     | -D50      | 31,166     |
| <b>AS25</b>   | Pc3_assembly   | 22.8     | -D50      | 4,448      |
| <b>AS25-3</b> | P2niaD18       | 27.8     | -D60      | 32,426     |
| <b>AS25-3</b> | AS25_consensus | 28.0     | -D60      | 17,694     |

66

#### 67 **e) Construction of consensus sequences**

68 The consensus sequences were constructed with mpileup and bcftools, both parts of samtools, on the  
69 basis of afore produced bam files. An example is given below, including the used settings for mpileup  
70 and bcftools. The consensus sequences of Pc3, AS25, and AS25-3 were calculated based on the  
71 P2niaD18 reference sequences. The consensus sequences were used for comparative SNP analyses as  
72 described in section II.

```

73 samtools mpileup -uf P2_niaD18.fa Pc3_500PE_vs_P2_niaD18_sorted.bam | bcftools view -cg - |
74 vcftutils.pl vcf2fq > Pc3_500PE_vs_P2_niaD18_consensus.fq
75

```

## 75 **II. De novo assembly of the Pc3 genome sequence**

76 The corrected reads of Pc3 (see section I) were used for an assembly with Velvet 1.2.10 (Zerbino &  
77 Birney, 2008). The files containing the paired ends were shuffled and printed into a single file.

```

78 shuffleSequences_fastq.pl NG-6796_Pc3_lib26819_1663_8_1_trimmed_paired.fastq
79 NG-6796_Pc3_lib26819_1663_8_2_trimmed_paired.fastq
80 NG-6796_Pc3_lib26819_1663_8_shuffled_trimmed_paired.fastq

```

81 Unpaired reads were combined to a single file using the cat command inside the Unix prompt.

82 `cat NG-6796_Pc3_lib26819_1663_8_1_trimmed_unpaired.fastq`  
83 `NG-6796_Pc3_lib26819_1663_8_2_trimmed_unpaired.fastq > Pc3_500PE_trimmed_unpaired.fastq`

84 To define the best kmer size for Velvet, we tested values between 31 and 75.

85 `./velveth output 33,81,4 -short -fastq ./input/Pc3_500PE_trimmed_unpaired.fastq -shortPaired -fastq`  
86 `./input/NG-6796_Pc3_lib26819_1663_8_shuffled_trimmed_paired.fastq`

87 `./velvetg output_39 -exp_cov auto -cov_cutoff auto -min_contig_lgth 1000 -ins_length 300`

88 Afterwards, we used the longest *de novo* assembled contig for mapping of the Pc3 reads, in order to  
89 predict the average insert length of the library. The insert length was calculated by analyzing the bam-  
90 file with FastQC v.0.10.1 (<http://www.bioinformatics.babraham.ac.uk/projects/fastqc>). Median  
91 insert length was calculated with 194 bp and mean insert with 182 bp. The median insert length was  
92 used to optimize parameters for Velvet.

93 `./velvetg output_41 -exp_cov auto -cov_cutoff 3 -min_contig_lgth 1000 -ins_length 192`

94 Usage of k-mer sizes greater than 45 shows a decreased value for N50. A k-mer size of 41 works best  
95 for the 100 nt paired end reads obtained from Pc3.

| k-mer size | N50 in bp | Nmax in bp | # of contigs | total length in bp | number of gaps | length of all gaps in bp | GC-content |
|------------|-----------|------------|--------------|--------------------|----------------|--------------------------|------------|
| 33         | 137,880   | 444,071    | 1,158        | 31,851,520         | 1,289          | 31,064                   | 49.0%      |
| 35         | 137,684   | 439,015    | 1,175        | 31,973,965         | 1,250          | 31,747                   | 49.0%      |
| 37         | 138,626   | 550,706    | 1,155        | 32,068,751         | 1,241          | 33,726                   | 49.0%      |
| 39         | 142,105   | 550,645    | 1,142        | 32,160,114         | 1,233          | 35,093                   | 49.0%      |
| 41         | 142,118   | 663,571    | 1,151        | 32,239,728         | 1,202          | 36,360                   | 49.0%      |
| 43         | 142,132   | 492,109    | 1,162        | 32,333,719         | 1,177          | 36,779                   | 49.0%      |
| 45         | 145,008   | 634,809    | 1,173        | 32,409,287         | 1,145          | 37,923                   | 48.9%      |
| 47         | 127,258   | 634,930    | 1,178        | 32,477,933         | 1,155          | 40,837                   | 48.9%      |
| 49         | 117,202   | 634,987    | 1,222        | 32,553,588         | 1,161          | 41,677                   | 48.9%      |
| 53         | 124,135   | 663,665    | 1,253        | 32,718,008         | 1,255          | 47,281                   | 48.9%      |
| 57         | 102,205   | 435,216    | 1,307        | 32,832,883         | 1,348          | 54,153                   | 48.9%      |
| 61         | 82,036    | 410,780    | 1,432        | 32,957,557         | 1,564          | 65,839                   | 48.9%      |
| 65         | 66,267    | 342,584    | 1,555        | 33,045,434         | 2,131          | 90,480                   | 48.8%      |

### 96 III. Comparison of SNPs using custom-made Perl scripts

97 In order to identify differently inherited genomic regions inside the genome of ascospore isolate  
98 AS25-3 we first calculated the SNPs of the parental strains by mapping AS25 on P2niaD18. After this  
99 step, we predicted an AS25-3 consensus sequence based on P2niaD18 and compared the SNPs in the  
100 parental strains with the consensus sequence of the progeny by two custom-made Perl scripts, both are  
101 available upon request.

102 The first Perl script (`SNP_comparison_vcf2vcfo.pl`) reads in the vcf output file form mpileup,  
103 containing all SNPs in the parental strains AS25 and P2niaD18, and the sequence file containing the  
104 consensus sequence of the progeny AS25-3, which was constructed on the genome sequence of  
105 P2niaD18. In order to analyze the four consensus chromosomes of AS25-3 separately, we wrote each of  
106 the four consensus sequences into four online formatted fasta files. The perl script compares each SNP  
107 of the parental strains with the equivalent position of the consensus sequence of the progeny. Regions

108 inside the consensus sequence that show a low coverage ( $<5\times$ ) or an unclear base calling due to an  
109 inconsistent mapping were marked by mpileup with small letters or “n”, instead of capitalized letters.  
110 To avoid a comparison with those regions, the text-based comparison differentiated between capitalize  
111 and non-capitalized letters. In addition, only parental SNPs with a quality score greater than 50 and an  
112 allele frequency of 1.0, hereafter referred to as high quality SNPs, were used for further analysis. The  
113 perl script was designed to compare all parental SNPs to their corresponding position inside the AS25-  
114 3 consensus sequence, using the reference and alternative nucleotide in column four and five of the vcf  
115 file. After comparison, the script adds two columns at the end of the vcf file, containing the name  
116 (P2niaD18 or AS25) of the parental strain that matched to the nucleotide of the consensus sequence  
117 and the compared nucleotide that was extracted from the AS25-3 consensus sequence. SNPs that did  
118 not match to one or the other parental strain were marked with a question mark “?”, representing an  
119 ambiguous result. In addition, a question mark tags all SNPs that were located into regions with a low  
120 sequencing coverage of AS25-3. The extended vcf file, containing the two additional columns with the  
121 information of the origin of the SNPs inside the parental strains and the nucleotide determined from  
122 the consensus sequence of the progeny was renamed into vcfo.  
123 The second Perl script (sliding-window-vcfo\_stats\_origin.pl) uses the vcfo file as input in order to  
124 perform a sliding window analysis by counting all SNPs inside a predetermined window. The script  
125 prints out the number of SNPs assigned to each parental strain and all inconsistent results inside each  
126 window and performs a statistical survey. In order to determine the best sliding window sizes for our  
127 analyses, we performed analyses with 500 bp, 1 kb, 5 kb, 10 kb, 20 kb and 50 kb windows. For 10 kb  
128 windows, best resolution was obtained. 500 bp windows were used to analyze putative recombination  
129 sites in detail. Based on the results of the 10 kb sliding window analysis, a score for each windows  
130 was determined in order to assign the corresponding sequence to one or the other parental strain. The  
131 score for each window was defined as the difference of SNPs assigned to each parental strain divided  
132 by the amount of total SNPs inside the window. Therefore, the value of the score ranges between -1  
133 and 1. The resulting score for each window was used as an indication of the origin of the genomic  
134 region. All sliding windows that show a score of -1.0 or 1.0 were clearly and unambiguously assigned  
135 to one or the other parental strain. Sliding windows with scores between -0.5 and 0.5 were considered  
136 as not reliable to predict the origin of the sequence. Only windows with scores ranging between -1.0  
137 and -0.5 or 0.5 and 1.0, respectively, were shown in the figures.

138 **Supplementary Tables**139 **Table S1.** List of plasmids used in this study

| Plasmid          | Characteristics                                                                                                                                                                    | Reference or source        |
|------------------|------------------------------------------------------------------------------------------------------------------------------------------------------------------------------------|----------------------------|
| pKOMAT           | 5' flanking region of <i>MAT1-2-1</i> , <i>trpC</i> promoter of <i>A. nidulans</i> , <i>ble</i> resistance gene of <i>S. hindustanus</i> , 3' flanking region of <i>MAT1-2-1</i>   | Böhm <i>et al.</i> , 2013  |
| pT3T7-gpd        | <i>gpd</i> promoter of <i>A. nidulans</i>                                                                                                                                          | Böhm <i>et al.</i> , 2013  |
| pDrive-ptrA      | <i>ptrA</i> resistance gene of <i>A. oryzae</i>                                                                                                                                    | Böhm <i>et al.</i> , 2013  |
| pPgpd-MAT-2-ptrA | <i>gpd</i> promoter of <i>A. nidulans</i> , <i>MAT1-2-1</i> gene of <i>P. chrysogenum</i> , <i>ptrA</i> resistance gene of <i>A. oryzae</i>                                        | This study                 |
| pKOku70          | 5' flanking region of <i>Pcku70</i> , <i>trpC</i> promoter of <i>A. nidulans</i> , <i>nat1</i> resistance gene of, 3' flanking region of <i>Pcku70</i>                             | Hoff <i>et al.</i> , 2010b |
| pKOku70MAT2      | 5' flanking region of <i>MAT1-2-1</i> and <i>MAT1-2-1</i> gene, <i>trpC</i> promoter of <i>A. nidulans</i> , <i>nat1</i> resistance gene of, 3' flanking region of <i>Pcku70</i>   | This study                 |
| pKompMAT2        | 5' flanking region of <i>MAT1-2-1</i> and <i>MAT1-2-1</i> gene, <i>trpC</i> promoter of <i>A. nidulans</i> , <i>nat1</i> resistance gene of, 3' flanking region of <i>MAT1-2-1</i> | This study                 |

140 **Table S2.** List of bacterial and fungal strains used in this study

| Strain                  | Characteristics and genotype                                                                                | Mating type                        | Reference or source            |
|-------------------------|-------------------------------------------------------------------------------------------------------------|------------------------------------|--------------------------------|
| Pc3<br>(syn. IB 08/921) | Wild type                                                                                                   | <i>MAT1-2-1</i>                    | Böhm <i>et al.</i> , (2013)    |
| NRRL 1951               | Wild type                                                                                                   | <i>MAT1-1-1</i>                    | Gailey <i>et al.</i> , (1946)  |
| Q176                    | Derivative of NRRL 1951                                                                                     | <i>MAT1-1-1</i>                    | Gailey <i>et al.</i> , (1946)  |
| Wisconsin 54-1255       | Derivative of Q176                                                                                          | <i>MAT1-1-1</i>                    | Gailey <i>et al.</i> , (1946)  |
| P2niaD18                | <i>niaD</i> <sup>-</sup>                                                                                    | <i>MAT1-1-1</i>                    | Hoff <i>et al.</i> , (2008)    |
| AS 25                   | progeny from Q176 x Pc3                                                                                     | <i>MAT1-2-1</i>                    | Böhm <i>et al.</i> , (2013)    |
| AS25-3                  | progeny from AS25 x P2niaD18                                                                                | <i>MAT1-1-1</i>                    | This study                     |
| ΔMAT1-2-1 T10           | <i>MAT1-2-1Δ::ble</i>                                                                                       |                                    | This study                     |
| ΔMAT1-2-1 T1            | <i>MAT1-2-1Δ::ble; Pcku70Δ::nat1</i>                                                                        |                                    | This study                     |
| ΔMAT1-2-1 T4            | <i>MAT1-2-1Δ::ble; Pcku70Δ::nat1</i>                                                                        |                                    | This study                     |
| ΔMAT1-2-1::MAT1-2-1 T24 | <i>MAT1-2-1Δ::ble; MAT1-2-1; nat1</i>                                                                       | <i>MAT1-2-1</i>                    | This study                     |
| ΔMAT1-2-1::MAT1-2-1 T26 | <i>MAT1-2-1Δ::ble; MAT1-2-1; nat1</i>                                                                       | <i>MAT1-2-1</i>                    | This study                     |
| Pc3::MAT1-2-1 T20       | <i>Pgpd::MAT1-2-1; ptrA</i>                                                                                 | <i>MAT1-2-1</i>                    | This study                     |
| Pc3::MAT1-2-1 T23       | <i>Pgpd::MAT1-2-1; ptrA</i>                                                                                 | <i>MAT1-2-1</i>                    | This study                     |
| Pc3::MAT1-2-1 T26       | <i>Pgpd::MAT1-2-1; ptrA</i>                                                                                 | <i>MAT1-2-1</i>                    | This study                     |
| P2::MAT1-2-1 T1         | <i>Pgpd::MAT1-2-1; ptrA; niaD</i> <sup>-</sup>                                                              | <i>MAT1-1-1</i><br><i>MAT1-2-1</i> | This study                     |
| P2::MAT1-2-1 T2         | <i>Pgpd::MAT1-2-1; ptrA; niaD</i> <sup>-</sup>                                                              | <i>MAT1-1-1</i><br><i>MAT1-2-1</i> | This study                     |
| P2::MAT1-2-1 T5         | <i>Pgpd::MAT1-2-1; ptrA; niaD</i> <sup>-</sup>                                                              | <i>MAT1-1-1</i><br><i>MAT1-2-1</i> | This study                     |
| XL1-Blue K12            | <i>recA1, endA1, gyrA96, thi1, hsdR17, supE44, relA1, lac-</i> , [F' <i>proAB, lacIqZΔM15, Tn10(tetr)</i> ] |                                    | Bullock <i>et al.</i> , (1987) |

141 **Table S3.** List of oligonucleotides used in this study

| #  | Oligonucleotide          | Sequence (5'-3')                         | Specificity                    |
|----|--------------------------|------------------------------------------|--------------------------------|
| 1  | P <sub>trpC</sub> _anti1 | GGCATTTCATTGTTGACCTCCACTAG               | <i>trpC</i> promoter           |
| 2  | Tn5-phleo                | GCGCCTGATACAGAACGAATTGC                  | <i>Ble</i> resistance gene     |
| 3  | ApaI-MAT2                | GGGCCCATGATGGCGAAAACCCTC                 | <i>MAT1-2-1</i> gene           |
| 4  | MluI-MAT2                | ACGCGTTTAGAACACGCTGTTTCATAG              | <i>MAT1-2-1</i> gene           |
| 5  | APN1                     | ACTTTCATCTGGGCCAGCGAGTGG                 | 5' flank <i>MAT1-2</i> locus   |
| 6  | SLA2                     | GCCCCGCCAGCGTCTGGGCGAAATG                | 3' flank <i>MAT1-2</i> locus   |
| 7  | MAT1-2-1_f               | GCCTTGCCTCAATGGAGTTC                     | <i>MAT1-2-1</i> gene           |
| 8  | PcMAT2_f                 | CCTTGGTGCACGCTGGAACAAT                   | <i>MAT1-2-1</i> gene           |
| 9  | PcMAT2_r                 | CCTGATCGTAGAGAATCATCCACTT                | <i>MAT1-2-1</i> gene           |
| 10 | Pc848_2170_r             | CTTGAGTTCATCAGCCAGGTGGGTGA<br>ACTG       | <i>MAT1-2-1</i> gene           |
| 11 | Pc_HMG_f                 | CGATGGCGTTCTTGACCTGG                     | <i>MAT1-2-1</i> gene           |
| 12 | Pc_HMG_r                 | GCCTGAACAAAAGGCAGG                       | <i>MAT1-2-1</i> gene           |
| 13 | PcI <sub>A</sub> _f      | TGTGGTATTACCGGGAAGTC                     | <i>pclA</i> (Pc22g14900) gene  |
| 14 | PcI <sub>A</sub> _r      | ACAATTCGTGCCTCGACTCC                     | <i>pclA</i> (Pc22g14900) gene  |
| 15 | Chry1                    | GAGTTTGACTCGGGTCTTCG                     | Pc21g16000 gene                |
| 16 | Chry4                    | AGCCAATTCCATCTGCTCTG                     | Pc21g16000 gene                |
| 17 | PcpenDE_f                | CTGCCACCAAAGAGATGATCC                    | <i>PcpenDE</i> gene            |
| 18 | PcpenDE_r                | CCTGGCGTTGAGCGCAGACCT                    | <i>PcpenDE</i> gene            |
| 19 | p <sub>pcbC</sub> _f     | CACCCATGGCTTCCACCCCAAGGCC<br>AATG        | <i>Pcp<sub>pcbC</sub></i> gene |
| 20 | p <sub>pcbC</sub> _r     | GTGCCATGGCTGTCTGGCCGTTCTTG<br>TTGATTAGAC | <i>Pcp<sub>pcbC</sub></i> gene |
| 21 | PcFluG_f                 | CCACCATGCCATAACCTATTGAA                  | <i>PcfluG</i> gene             |
| 22 | PcFluG_r                 | GCAAATTTCCGATACAAAACCAAC                 | <i>PcfluG</i> gene             |
| 23 | flbB_f                   | GCCAATGGCATGGACCACTC                     | <i>PcflbB</i> gene             |
| 24 | flbB_r                   | TGACCAAGTGCTGTCAAGAG                     | <i>PcflbB</i> gene             |
| 25 | nsdD_f                   | TAGCGTGGCTTCGCCTAATG                     | <i>PcnsdD</i> gene             |
| 26 | nsdD_r                   | TAGAGCACCGAGTAGGGAAG                     | <i>PcnsdD</i> gene             |
| 27 | Pc23g00420_f             | TAGAGACCACGGTGCCGAAC                     | Pc2300420 gene                 |
| 28 | Pc23g00420_r             | CATTCAAGCGTGCTAGATCC                     | Pc2300420 gene                 |
| 29 | Pc24g01940_f             | GTCAGCACGCCTATAGACAC                     | Pc24g01940 gene                |

|    |                 |                       |                                    |
|----|-----------------|-----------------------|------------------------------------|
| 30 | Pc24g01940_r    | CTCAGCAACCGGGATATTTTC | Pc24g01940 gene                    |
| 31 | Pc12g12190_f    | GCCTTCCAGCTATGCCTACG  | <i>PcflbC</i> gene                 |
| 32 | Pc12g12190_r    | ACGCCCAGGTCTAGCGAAAG  | <i>PcflbC</i> gene                 |
| 33 | Pc13g04920_f    | TGAGCAACCAGCGCTCAATG  | <i>PcstuA</i> gene                 |
| 34 | Pc13g04920_r    | CTTGCGCCTAGTTCTCCTCC  | <i>PcstuA</i> gene                 |
| 35 | RT-MAT1-2-1_f   | TGCCTTTTGTTCAGGCTGATT | <i>MAT1-2-1</i> gene               |
| 36 | RT-MAT1-2-1_r   | AGTGAAAGGGGGAGAGAGTGG | <i>MAT1-2-1</i> gene               |
| 37 | RT_fphA_f       | CGCTCCCCAGTATTCGGGTT  | <i>PcfphA</i> gene                 |
| 38 | RT_fphA_r       | TTCAGGATCGGGGTGTTCCGG | <i>PcfphA</i> gene                 |
| 39 | RT_lreB_f       | GGAACTACGGGGTGCAAGGT  | <i>PclreB</i> gene                 |
| 40 | RT_lreB_r       | CGACGGGTTGGCATAGGTGA  | <i>PclreB</i> gene                 |
| 41 | RT_cryA_f       | CGCAGCCCTATTTCCGCATC  | <i>PccryA</i> gene                 |
| 42 | RT_cryA_r       | GGCCTGGGGTAGCCATTCTT  | <i>PccryA</i> gene                 |
| 43 | RT_PcbrlA_f     | GTGACCCCTCCTTCTTCGTC  | <i>PcbrlA</i> gene                 |
| 44 | RT_PcbrlA_r     | GTCTGACCCTGAGGGAGTAC  | <i>PcbrlA</i> gene                 |
| 45 | NcSSU1          | ATCCAAGGAAGGCAGCAGGC  | <i>small subunit ribosomal RNA</i> |
| 46 | NcSSU2          | TGGAGCTGGAATTACCGCG   | <i>small subunit ribosomal RNA</i> |
| 47 | Pc3-contig_24_f | ACTTGGTTGTGCCTGTGTTG  | Chromosomal translocation          |
| 48 | Pc3-contig_24_r | GGCTGTGGCGTAACTGTATG  | Chromosomal translocation          |
| 49 | Pc3-contig_35_f | AGTGGAAGTTCGGCCTGAAC  | Chromosomal translocation          |
| 50 | Pc3-contig_35_r | TCTACAGGACACGTGAGCAC  | Chromosomal translocation          |
| 51 | AS25_chrI_1_f   | TTCCTTGTCGGGCTTGACC   | Verification of recombination      |
| 52 | AS25_chrI_1_r   | AGAGGATCGTGATGACCGAG  | Verification of recombination      |
| 53 | AS25_chrII_1_f  | CCTACCAACCTTGTTTCAGAC | Verification of recombination      |
| 54 | AS25_chrII_1_r  | AGTTACTCCACCGAGTCTGC  | Verification of                    |



|    |                |                                             |                                  |
|----|----------------|---------------------------------------------|----------------------------------|
|    |                |                                             | recombination                    |
| 55 | AS25_chrII_2_f | ATAGTCATCGGCAACCAGTC                        | Verification of recombination    |
| 56 | AS25_chrII_2_r | ATGGGTCTCATGATTCCACG                        | Verification of recombination    |
| 57 | SNP_check1_f   | GACCAACACATCGCCAAACG                        | Verification of SNPs             |
| 58 | SNP_check1_r   | GGATGACAAGGTACCTGTGC                        | Verification of SNPs             |
| 59 | SNP_check2_f   | CTTCTGCATCCTGCGATACC                        | Verification of SNPs             |
| 60 | SNP_check2_r   | AGATCTGGCCATAGGAGTGC                        | Verification of SNPs             |
| 61 | SNP_check3_f   | AGTCAACGTACCTCGACAG                         | Verification of SNPs             |
| 62 | SNP_check3_r   | CTACACCACGAACGAGAGTC                        | Verification of SNPs             |
| 63 | SNP_check4_f   | ACATTCCGGAACGAGGAAGC                        | Verification of SNPs             |
| 64 | SNP_check4_r   | CTCGGCATGTCAAATCTGG                         | Verification of SNPs             |
| 65 | SNP_check5_f   | CATACCGCACCAAACACCTG                        | Verification of SNPs             |
| 66 | SNP_check5_r   | ACCCTCCTCCTCTTCAACTG                        | Verification of SNPs             |
| 67 | SNP_check6_f   | CTCTGCCATTCTCTTGGTC                         | Verification of SNPs             |
| 68 | SNP_check6_r   | GCTGTGGATCAAAGGCAAGC                        | Verification of SNPs             |
| 69 | SNP_check7_f   | TATCTGGCATGGGCTCTTCG                        | Verification of SNPs             |
| 70 | SNP_check7_r   | TGCAAGTGCCATTCTGGGTC                        | Verification of SNPs             |
| 71 | SNP_check8_f   | ACGTTCCGATGACTCGCATC                        | Verification of SNPs             |
| 72 | SNP_check8_r   | ATTGCCTGCGGTCACAGATG                        | Verification of SNPs             |
| 73 | SNP_check9_f   | TCAAGGAGAAGGTCGACGAC                        | Verification of SNPs             |
| 74 | SNP_check9_r   | GAGGCAGCAACTGTTCCAAG                        | Verification of SNPs             |
| 75 | SNP_check10_f  | GTCGATACACCGTCAACGTG                        | Verification of SNPs             |
| 76 | SNP_check10_r  | GATACGGCCTTACCTTGTCC                        | Verification of SNPs             |
| 77 | SNP_check11_f  | GCGTATTGAATCCGCTTAGC                        | Verification of SNPs             |
| 78 | SNP_check11_r  | GATAGCTATAGCGGGACAGC                        | Verification of SNPs             |
| 79 | SNP_check12_f  | GAAGCTAGGATATGGGAGAG                        | Verification of SNPs             |
| 80 | SNP_check12_r  | CACCTCGCTTGTGAAATACG                        | Verification of SNPs             |
| 81 | SNP_check13_f  | GCAACATCTGGATAGGCACG                        | Verification of SNPs             |
| 82 | SNP_check13_r  | GCAATGTGGCGTGTATGACC                        | Verification of SNPs             |
| 83 | 5FMAT2inf_f    | CGGTACCACGCATGCTGCAGGTTAAT<br>TGAGCACGGAGAG | 5' flank and <i>MAT1-2</i> locus |
| 84 | 5FMAT2inf_r    | CACGAATTCTGGATCGCTGAGCCGAG                  | 5' flank and <i>MAT1-2</i>       |

|    |             |                                         |                              |
|----|-------------|-----------------------------------------|------------------------------|
|    |             | TCGAAATTG                               | locus                        |
| 85 | 3FMAT2inf_f | GCCCATCTGAATTCGTCGAATGTCCC<br>ATTCACAAT | 3' flank <i>MAT1-2</i> locus |
| 86 | 3FMAT2inf_r | CGAGAAGCTTGTCGATGTATCTTTCC<br>CTCTTGGCT | 3' flank <i>MAT1-2</i> locus |

142

143

144 **Supplementary Figures**

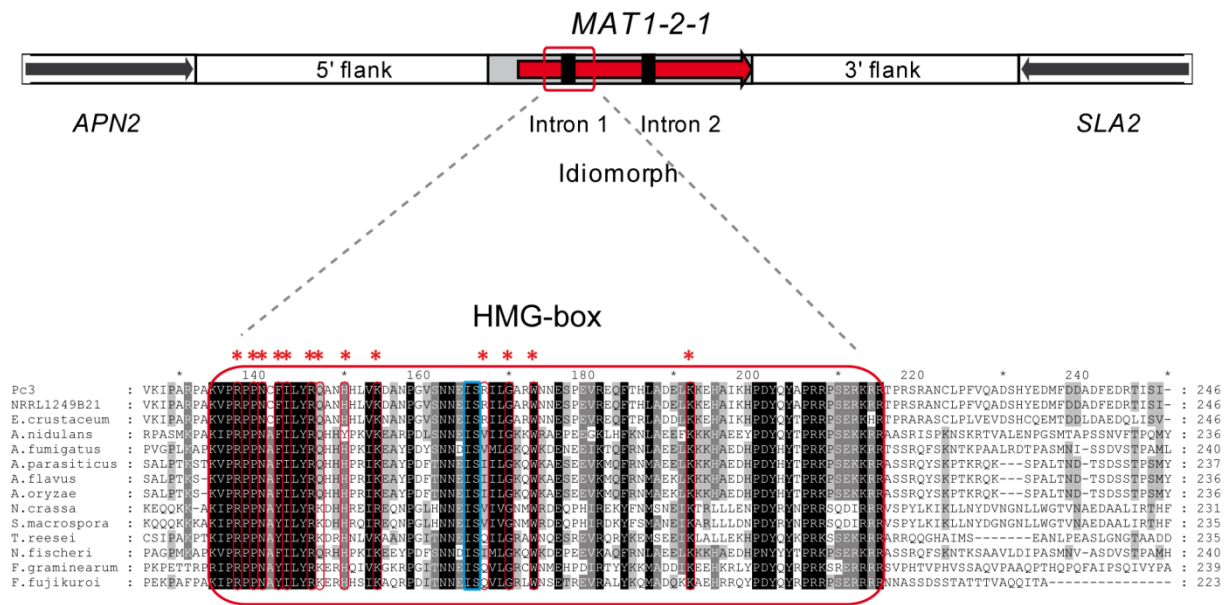

145  
 146 **Fig. S1.** Genomic organization of the *MAT1-2* locus and a multiple alignment of the HMG  
 147 domain proteins. The *MAT1-2* protein sequence of Pc3 is compared to HMG mating-type  
 148 proteins from the Fleming isolate NRRL1249B21 and other ascomycetes. Red: the HMG-box  
 149 domain. Asterisks: DNA binding sites. Blue: the conserved isoleucine-serine motif, upstream  
 150 of the conserved intron.

151

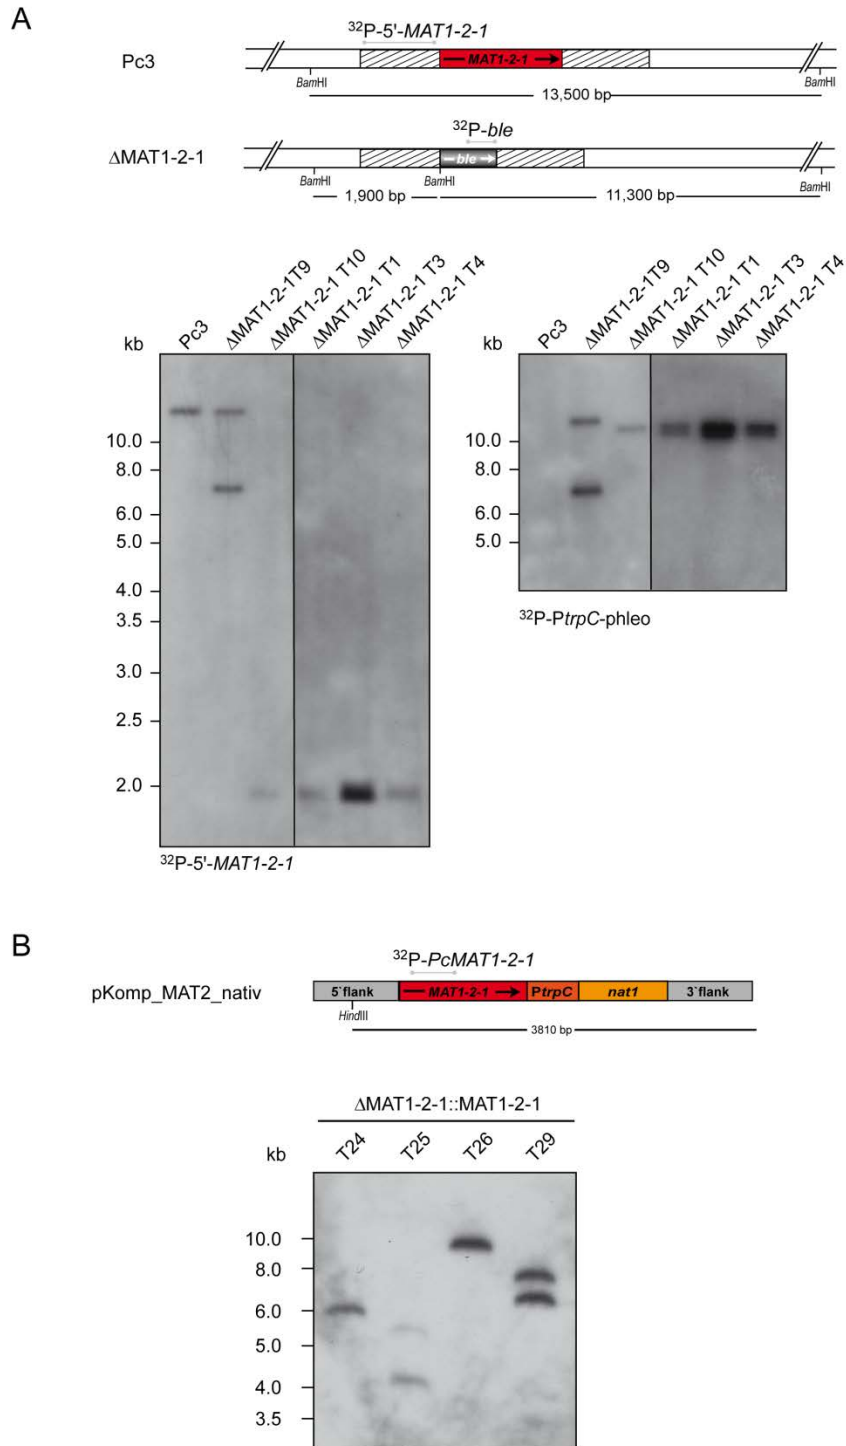

152

153 **Fig. S2.** Construction of  $\Delta$ MAT1-2-1 and complementation strains. A. Organization of the  
 154 *MAT1-2* locus in the reference strain, Pc3, and the derived knockout strains. The  
 155 corresponding Southern hybridization confirmed the knockout and the phleomycin resistance  
 156 cassette. B. Southern hybridization with *MAT1-2-1*-specific probes to verify successful rescue  
 157 of the deletion strain.

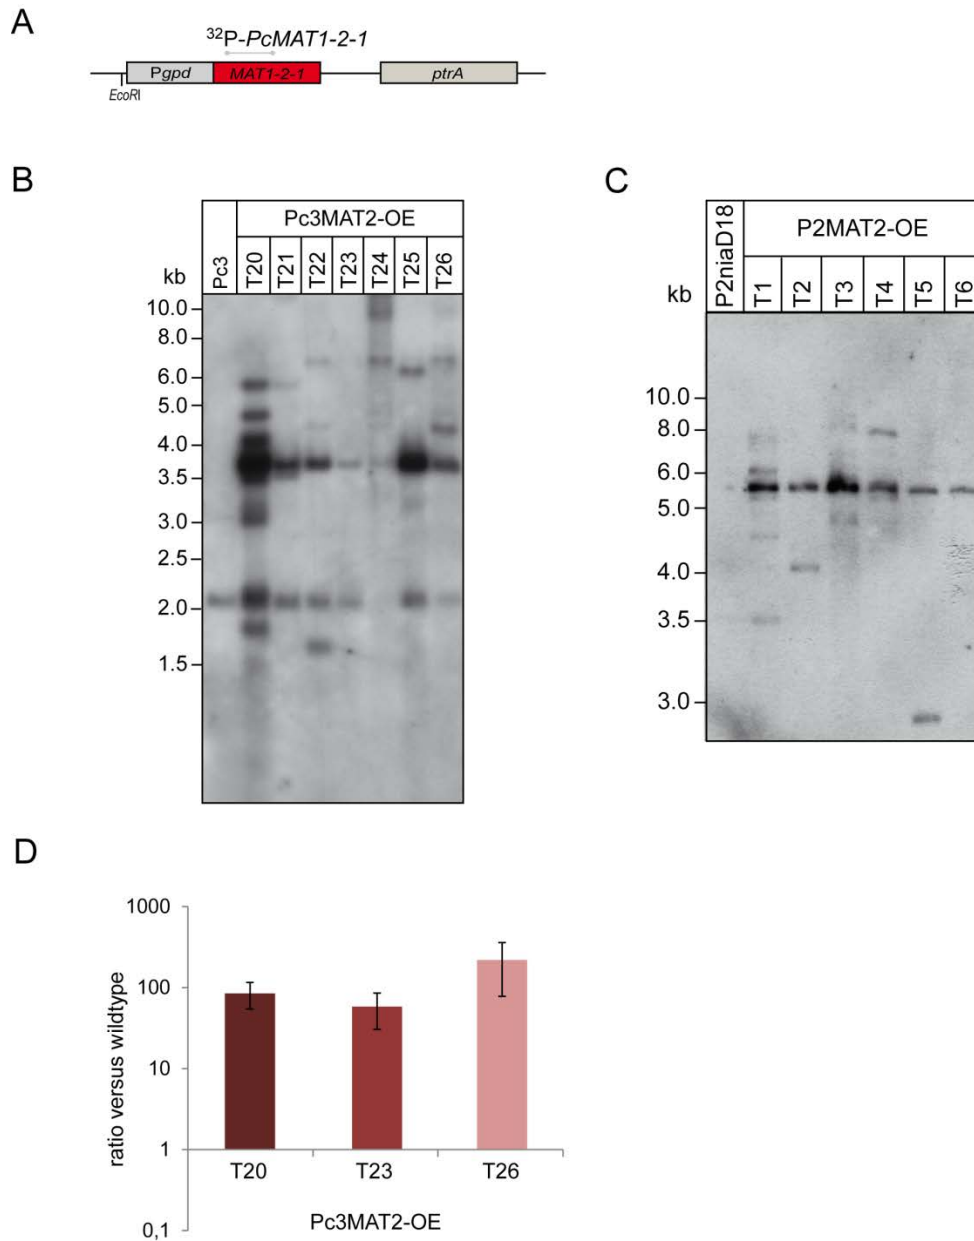

158  
159

160 **Fig. S3.** Construction of *MAT1-2-1* overexpression strains. A. Overexpression construct  
 161 generated to complement *MAT1-2-1* deletion strains. The *MAT1-2-1* gene is under the control  
 162 of the *gpd* promoter of *A. nidulans*. B. Southern hybridization verifies ectopic integration of  
 163 the *MAT1-2-1* gene into strain Pc3 with <sup>32</sup>P-labeled probes specific for *MAT1-2-1*. C.  
 164 Southern hybridization with <sup>32</sup>P-labeled probes specific for *MAT1-2-1* verifies ectopic  
 165 integration of *MAT1-2-1* in P2niaD18. D. qRT-PCR analysis of *MAT1-2-1* in overexpression  
 166 strains. Transformants were grown in liquid shaking cultures for 72 h. Values represent  
 167 average expression ratios of at least two biological replicates from three *MAT1-2-1*  
 168 overexpression (reddish) strains (n = 2), relative to reference Pc3.

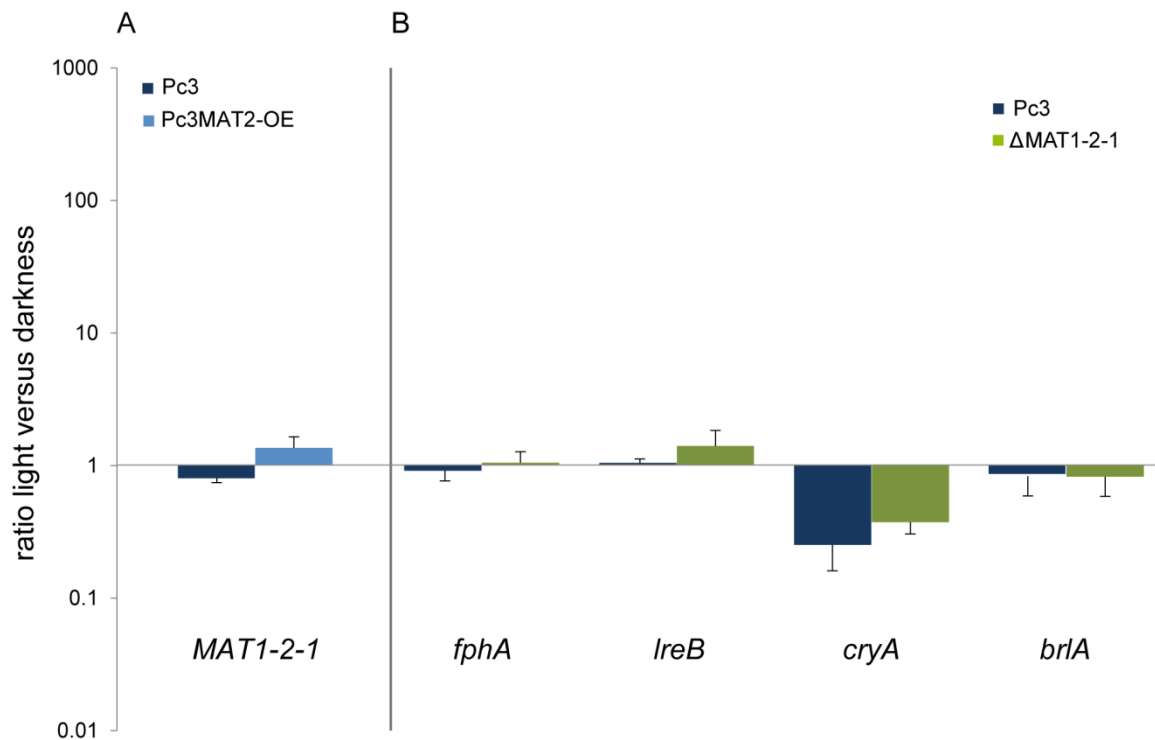

169

170 **Fig. S4.** Analysis of light-dependent transcriptional expression. qRT-PCR was conducted to  
 171 measure *MAT1-2-1* (A) or *fphA*, *ireB*, *cryA* or *brlA* (B) expression in strains as indicated.  
 172 Values represent average expression ratios of at least two biological replicates from three  
 173 independently derived strains (n = 3).

174

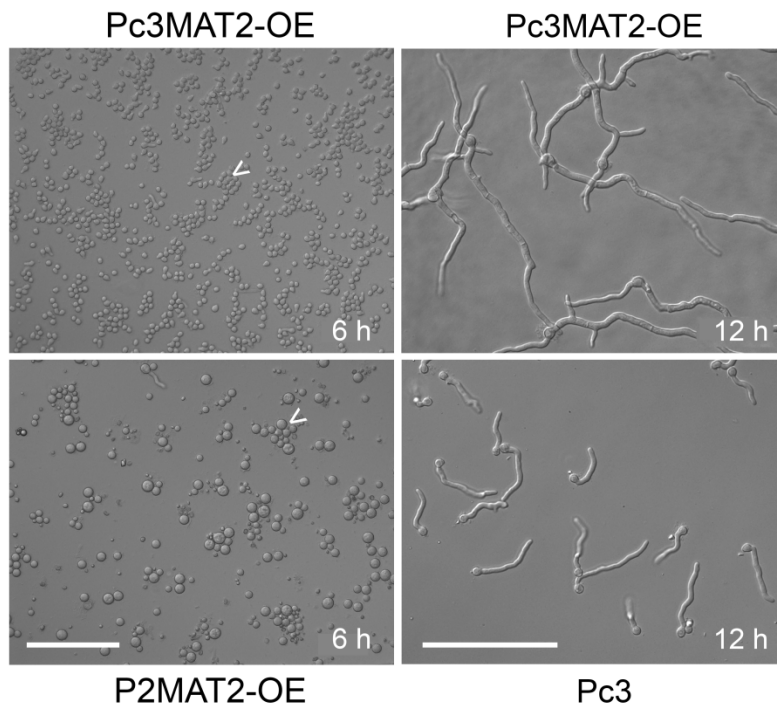

175

176 **Fig. S5.** Overview to demonstrate agglutination of conidiospores (Pc3MAT2-OE, P2MAT2-  
 177 OE) and formation of one or two biopolar germ tubes (Pc3MAT2-OE, Pc3). Arrowheads point  
 178 to agglutinated conidiospores. Scale bars correspond to 100  $\mu$ m in all images.

179

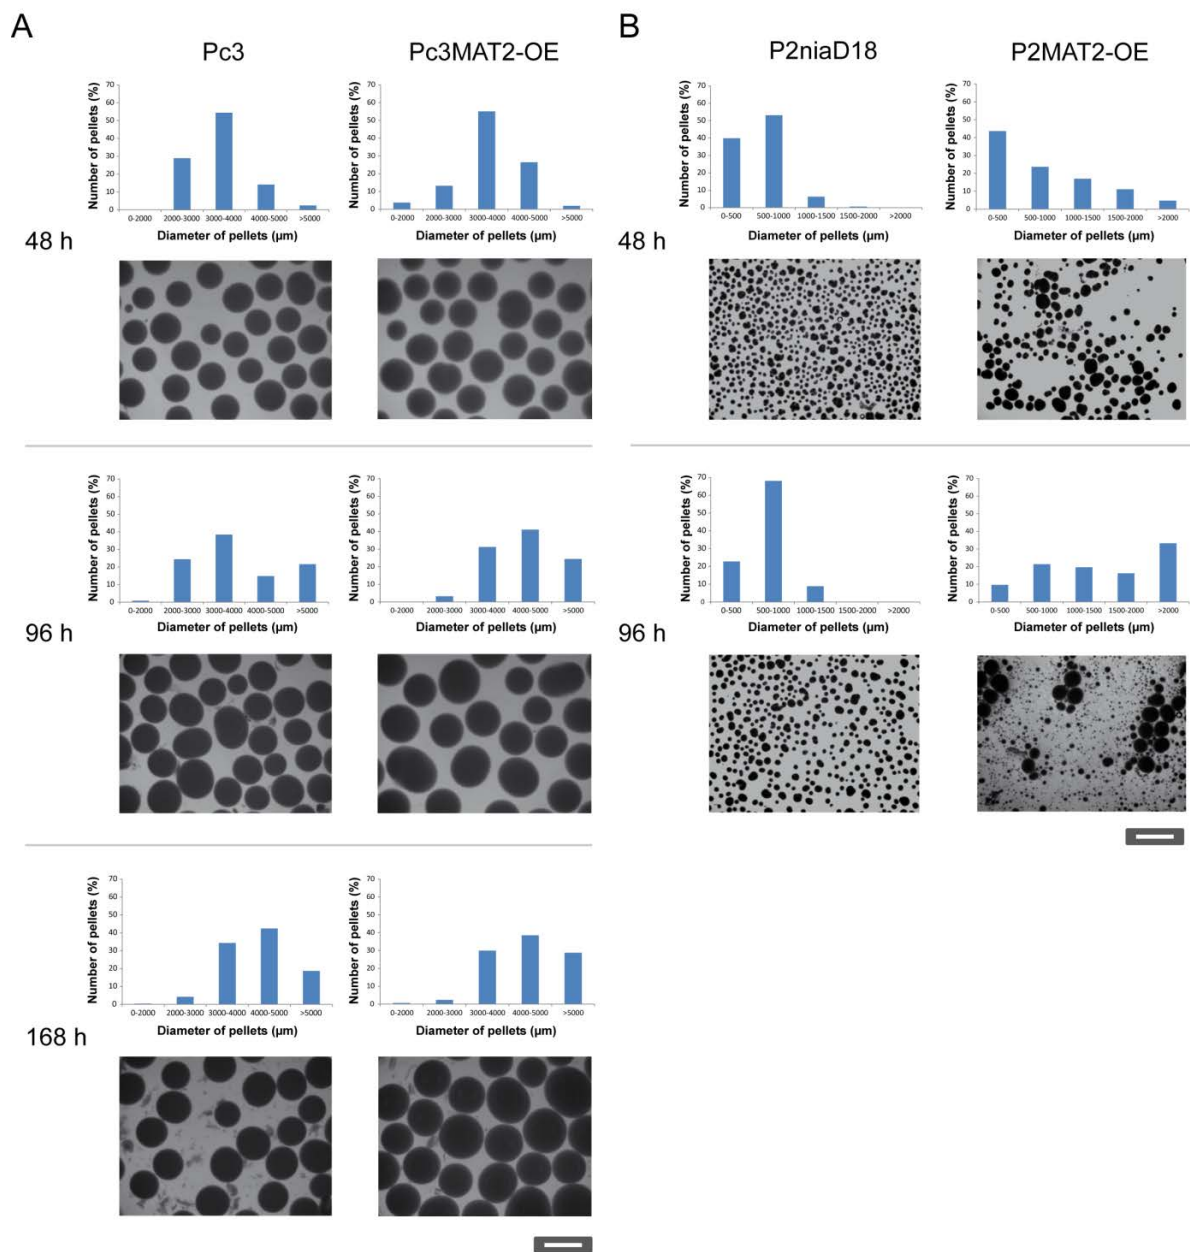

180

181 **Fig. S6.** Pellet formation in liquid shaking cultures formed by reference and recombinant  
 182 *MATI-2* and recombinant *MATI-1* strains. **A.** Quantification of pellet diameters formed from  
 183 *MATI-2-1* overexpression strains in the Pc3 background in liquid shaking CCM cultures.  
 184 Measurements were taken at three different time points, as indicated. Error bars represent the  
 185 mean  $\pm$  SD of 240 random pellets from three independent strains. **B.** Quantification of pellet  
 186 diameters formed from *MATI-2-1* overexpression strains in the P2niaD18 background in  
 187 liquid shaking CCM cultures. Measurements were taken at two different time points, as  
 188 indicated. Error bars represent the mean  $\pm$  SD of 240 random pellets from three independent  
 189 strains.



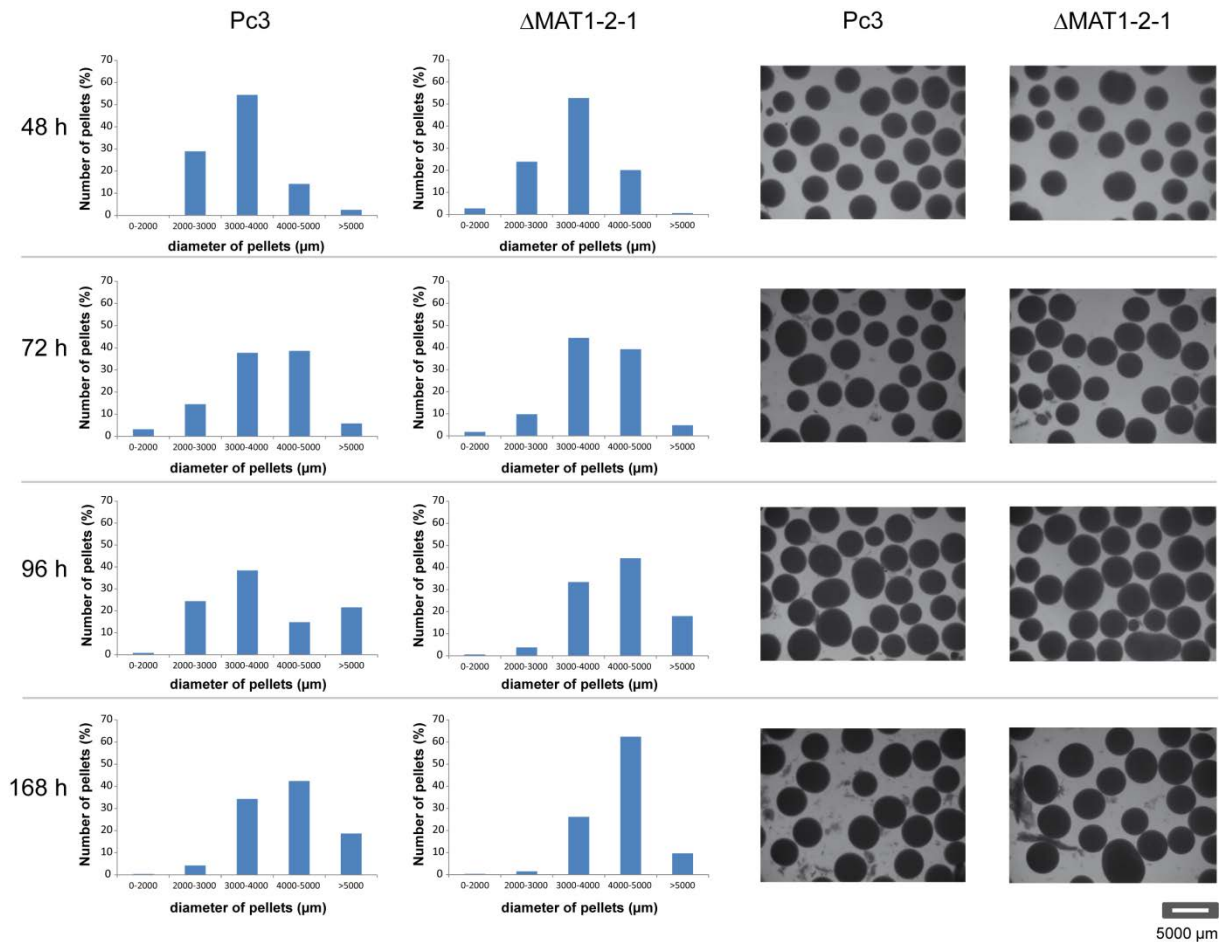

190  
 191 **Fig. S7.** Pellet formation in liquid shaking cultures. (Left) Quantification of pellet diameters  
 192 formed from *MAT1-2-1* deletion strains in liquid shaking CCM cultures. Measurements were  
 193 taken at four different time points, as indicated. Error bars represent the mean  $\pm$  SD of 240  
 194 random pellets from three independent strains. (Right) The pellet phenotypes are illustrated  
 195 with representative micrographs.  
 196

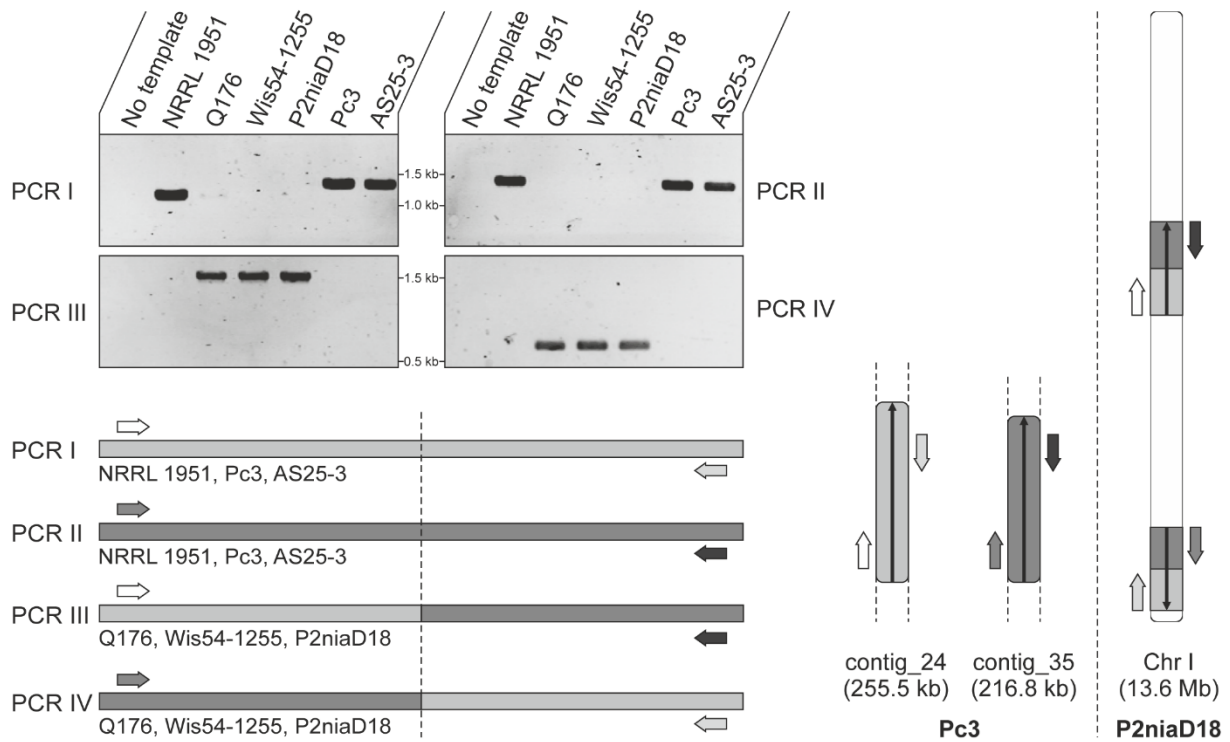

197  
198  
199  
200  
201  
202  
203  
204  
205  
206

**Fig. S8.** Verification of a chromosomal rearrangement in wild-type and penicillin-production strains by PCR analysis. The wild-type strains, NRRL 1951 and Pc3, and ascospore isolate, AS25-3, show the same chromosomal structure; in contrast, all low- and high-penicillin producers of the Wisconsin lineage (Q176, Wisconsin54-1255, and P2niaD18) have a different chromosomal organization at this locus. Primers for PCR amplification are marked by different shading, and binding sites are shown on chromosome I of P2niaD18 (Specht *et al.* 2014) and contig\_24 and contig\_35 of wild type Pc3.

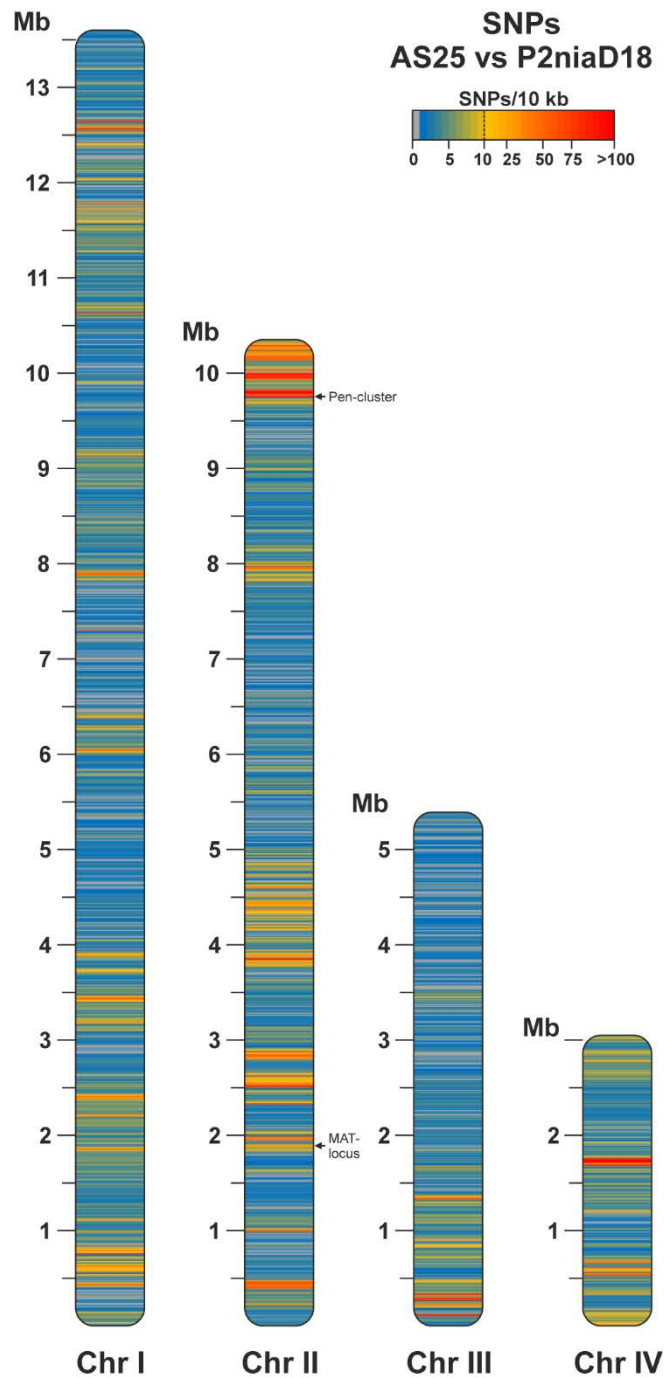

207

208 **Fig. S9.** Comparison of AS25 sequence to the published sequence of P2niaD18 (T. Specht *et*  
 209 *al.* 2014). Genome sequencing of AS25 reveals a high number of single nucleotide  
 210 polymorphisms (SNPs) compared to the industrial strain. The number of SNPs within 10 kb  
 211 windows is indicated with color. Locations of genes of particular interest are highlighted.

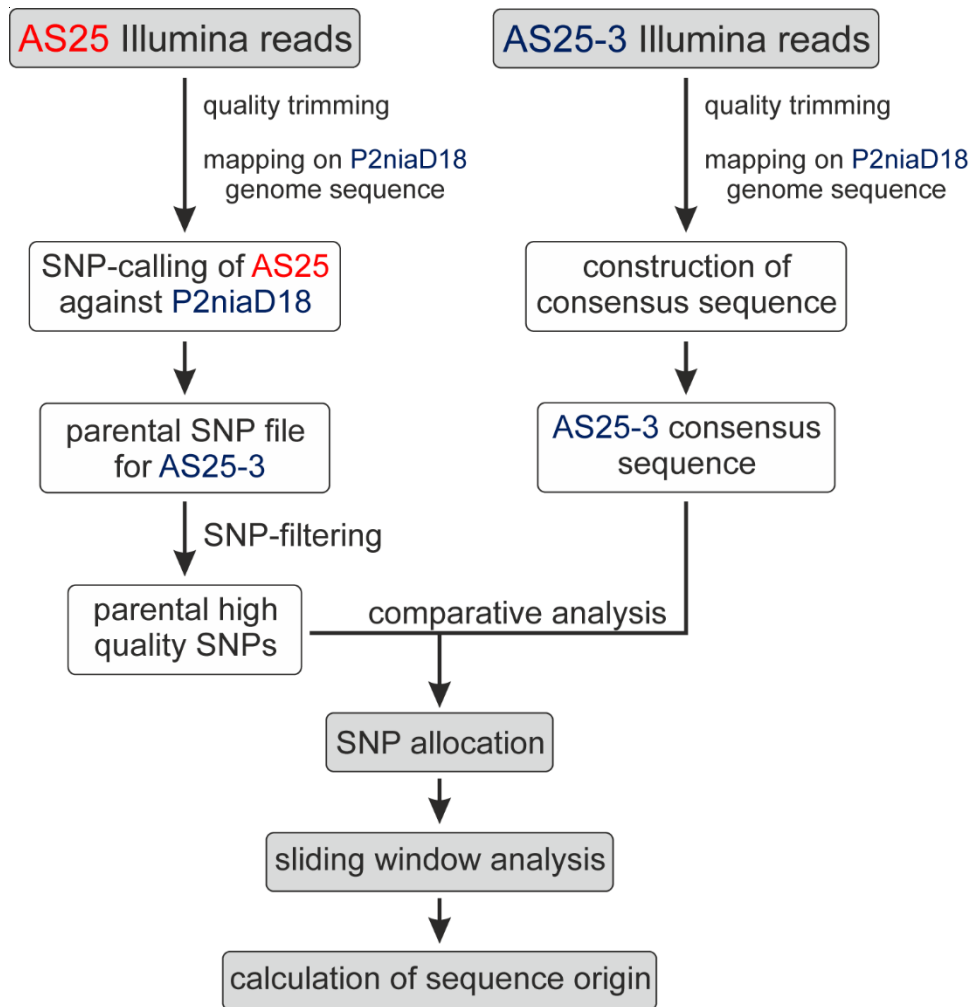

212  
213

214 **Fig. S10.** Flow chart of bioinformatic analysis to identify differently inherited genomic  
215 regions in AS25-3. Illumina reads of ascospore isolates AS25 and AS25-3 were trimmed and  
216 mapped on the P2niaD18 reference genome sequence (*MAT* loci are indicated by colors: blue  
217 for *MAT1-1*, and red for *MAT1-2*). SNPs in the parental strains P2niaD18 and AS25, and the  
218 AS25-3 consensus sequence were predicted. To clearly assign SNPs on the AS25-3 genome,  
219 comparative analysis were performed using parental high-quality SNPs (quality score >50,  
220 and allele frequency = 1.0). After SNP allocation, sliding-window analysis provides the basis  
221 to calculate differently inherited genomic regions inside AS25-3.

222
